# Supplementary material for: Prospecting the Resilience of Several Spanish Ancient Varieties of Red Grape under Climate Change Scenarios
Source: MDPI journal article supplement (doi:10.3390/plants11212929), 2022-10-31
Supplement: s1 [file s1]

**Table S1.** Code, passport number, variety name, origin, genotype, and molecular profiles (allele sizes in base pairs) of ancient grapevine varieties identified with 8 microsatellite markers.

| Code | Passport | Variety       | Origin              | Genotype | VMC4F31 |     | VVIN16 |     | VVIV37 |     | VVIV67 |     | VVMD27 |     | VVIP31 |     | VVS2 |     | ZAG79 |     |
|------|----------|---------------|---------------------|----------|---------|-----|--------|-----|--------|-----|--------|-----|--------|-----|--------|-----|------|-----|-------|-----|
| T24  | CS0024   | Tempranillo   | Bargota (Navarra)   | GEN 0055 | 179     | 183 | 151    | 153 | 171    | 171 | 366    | 368 | 183    | 183 | 178    | 180 | 141  | 144 | 247   | 251 |
| T73  | CS0073   | Tinto Velasco | Los Arcos (Navarra) | GEN 0062 | 187     | 206 | 151    | 151 | 158    | 158 | 358    | 375 | 179    | 185 | 184    | 190 | 131  | 131 | 237   | 251 |
| T72  | CS0072   | Graciano      | Los Arcos (Navarra) | GEN 0045 | 179     | 206 | 151    | 159 | 165    | 177 | 358    | 364 | 179    | 183 | 180    | 192 | 137  | 151 | 251   | 259 |
| T48  | CS0048   | Grand Noir    | Los Arcos (Navarra) | GEN 0157 | 173     | 179 | 151    | 153 | 163    | 177 | 358    | 364 | 181    | 183 | 176    | 180 | 137  | 151 | 243   | 259 |
